# Supplementary material for: Spontaneous flexoelectricity and band engineering in MS2 (M = Mo, W) nanotubes
Source: Royal Society of Chemistry journal article supplement (doi:10.1039/d1cp02090k), 2021-01-01
Supplement: d1cp02090k1.pdf [file d1cp02090k1.pdf]

## Supporting Information

### Spontaneous flexoelectricity and band engineering in $MS_2$ (M=Mo, W) nanotubes

Jiansheng Dong<sup>†</sup>, Huamin Hu<sup>†</sup>, Hai Li and Gang Ouyang<sup>\*</sup>

*Key Laboratory of Low-Dimensional Quantum Structures and Quantum Control of  
Ministry of Education, Key Laboratory for Matter Microstructure and Function of  
Hunan Province, School of Physics and Electronics, Hunan Normal University,  
Changsha 410081, China*

\*Email address: gangouy@hunnu.edu.cn

<sup>†</sup> These authors contributed equally to this work.

## Contents

- S1.** Calculation of Coulomb electrostatic energy of intertube
- S2.** Calculation of bond identities under different diameters
- S3.** Diameter-dependent M-S bond identities in SW armchair and zigzag MS<sub>2</sub>-NTs
- S4.** Band structures of monolayer MoS<sub>2</sub> and WS<sub>2</sub>
- S5.** Partial density of states of SW armchair and zigzag MoS<sub>2</sub>-NTs
- S6.** Phonon dispersion of SW MoS<sub>2</sub>-NTs
- S7.** Polarization of SW MoS<sub>2</sub>-NTs
- S8.** Electron density of SW MoS<sub>2</sub>-NTs
- S9.** DW armchair MoS<sub>2</sub>-NTs
- S10.** Band alignment of inner and outer tubes in DW MS<sub>2</sub>-NTs
- S11.** Evolution of band decomposed charge density of DW zigzag MoS<sub>2</sub>-NTs
- S12.** Charge density difference in DW MoS<sub>2</sub>-NTs
- Table S1:** The evolution of  $\angle ABC$  , bond lengths  $l_{AB}$  ,  $l_{BC}$  , and the amount of transferred charge of Mo and S atoms in SW armchair MoS<sub>2</sub>-NTs under different diameters.
- S13.** Spontaneous flexoelectricity and band engineering in MSe<sub>2</sub>-NTs and MTe<sub>2</sub>-NTs

## S1. Calculation of Coulomb electrostatic energy of intertube

For case of bilayer MoS<sub>2</sub>, the interaction between M-M and M-S can be negligible because the coupling of interlayer between M-M and S-M is far weaker than that of S-S, thus, the electronic coupling of two adjacent layers is mainly determined by the interlayer interaction of S-S. Therefore, the Coulomb electrostatic energy of interlayer can be written as  $U_{coul}^{layer} = C \frac{q_S q_S}{r_{S-S}}$ , where  $q_S$  is the partial electrostatic charges for S atoms,  $r_{S-S}$  is the distance of interlayer. Note that we estimate  $U_{coul}^{layer} = 0.14$  eV/atom. When a bilayer MoS<sub>2</sub> is rolled into DW NT, the distance of intertube is  $\sim 3.44$  Å and the Coulomb electrostatic energy is  $U_{coul}^{inter} = 0.12$  eV/atom, which is independent on tube diameter. Therefore, the variation of Coulomb electrostatic energy is  $\Delta U_{coul}^{inter} = 0.02$  eV/atom. Therefore, the Coulomb electrostatic energy of intertube can be neglected because this part is far weaker than that of bonds potential energy.

## S2. Calculation of bond identities under different diameters

In general, monolayer MS<sub>2</sub> is a hexagonal structure, where M layers are sandwiched by two S layers. The bond length  $h_0 = \sqrt{\left(\frac{a}{\sqrt{3}}\right)^2 + \left(\frac{c}{2}\right)^2}$ , and the bond angles  $\cos \theta = 1 - \frac{a^2}{2h_0^2}$  and  $\cos \psi = 1 - \frac{c^2}{2h_0^2}$ , where  $a$  and  $c$  are the in-plane lattice parameters at the equilibrium state.  $\theta$  and  $\psi$  are the in-plane and out-of-plane bond angles, respectively. When a monolayer MS<sub>2</sub> is rolled into nanotube (NT), the mirror symmetry will be broken. As a result, the inner part of NT shrinks and its outer part expands. Therefore, the inner and outer parts have same average strain, i.e.,

$\bar{\varepsilon}_{out} = -\bar{\varepsilon}_{in}$ . We can further obtain the average strain of the outer part of SW MS<sub>2</sub>-NTs

$$\bar{\varepsilon}_{out} = \int_0^{\frac{H}{2}} \frac{2}{H} z K dz = \frac{H}{2D} \quad (S1)$$

where  $H$  denotes the thickness of monolayer MS<sub>2</sub>,  $D$  is the NT diameter. Notably, the relationship between bond identities (bond length and bond angles) and diameter of SW MS<sub>2</sub>-NTs satisfies

$$\left\{ \begin{array}{l} h_1^{o,i} = \sqrt{\left(\frac{a}{\sqrt{3}}\left(1 \pm \frac{H}{2D}\right)\right)^2 + \left(\frac{H}{2}\left(1 \mathbf{m} \frac{H \cdot \nu_{\perp}}{2D}\right)\right)^2} \\ h_2^{o,i} = \sqrt{\left(\frac{a}{2}\left(1 \mathbf{m} \frac{H \cdot \nu_p}{2D}\right)\right)^2 + \left(\frac{a}{2\sqrt{3}}\left(1 \pm \frac{H}{2D}\right)\right)^2 + \left(\frac{H}{2}\left(1 \mathbf{m} \frac{H \cdot \nu_{\perp}}{2D}\right)\right)^2} \\ \theta_1^{o,i} = \arccos \left( \frac{h_1^{o,i2} + h_2^{o,i2} - \left(\frac{\sqrt{3}a}{2}\left(1 \pm \frac{H}{2D}\right)\right)^2 - \left(\frac{a}{2}\left(1 \mathbf{m} \frac{H \cdot \nu_p}{2D}\right)\right)^2}{2 \cdot h_1^{o,i2} \cdot h_2^{o,i2}} \right) \\ \theta_2^{o,i} = \arccos \left( 1 - \frac{a^2}{2 \cdot h_2^{o,i2}} \left(1 \mathbf{m} \frac{H \cdot \nu_p}{2D}\right)^2 \right) \\ \psi_1 = \arcsin \left( \frac{H}{2h_1^o} \left(1 - \frac{H \cdot \nu_{\perp}}{2D}\right) \right) + \arcsin \left( \frac{H}{2h_1^i} \left(1 + \frac{H \cdot \nu_{\perp}}{2D}\right) \right) \\ \psi_2 = \arcsin \left( \frac{H}{2h_2^o} \left(1 - \frac{H \cdot \nu_{\perp}}{2D}\right) \right) + \arcsin \left( \frac{H}{2h_2^i} \left(1 + \frac{H \cdot \nu_{\perp}}{2D}\right) \right) \end{array} \right. \quad (S2)$$

where  $h_1^{o,i}$ ,  $h_2^{o,i}$ ,  $\theta_1^{o,i}$ ,  $\theta_2^{o,i}$ ,  $\psi_1$  and  $\psi_2$  denote bond lengths and bond angles induced by curvature, respectively. The superscript  $o$  and  $i$  represent the inner and outer parts,  $\nu_{//}$  and  $\nu_{\perp}$  are the in-plane and out-of-plane Poisson's ratios.

### S3. Diameter-dependent M-S bond identities in SW armchair and zigzag MS<sub>2</sub>-NTs

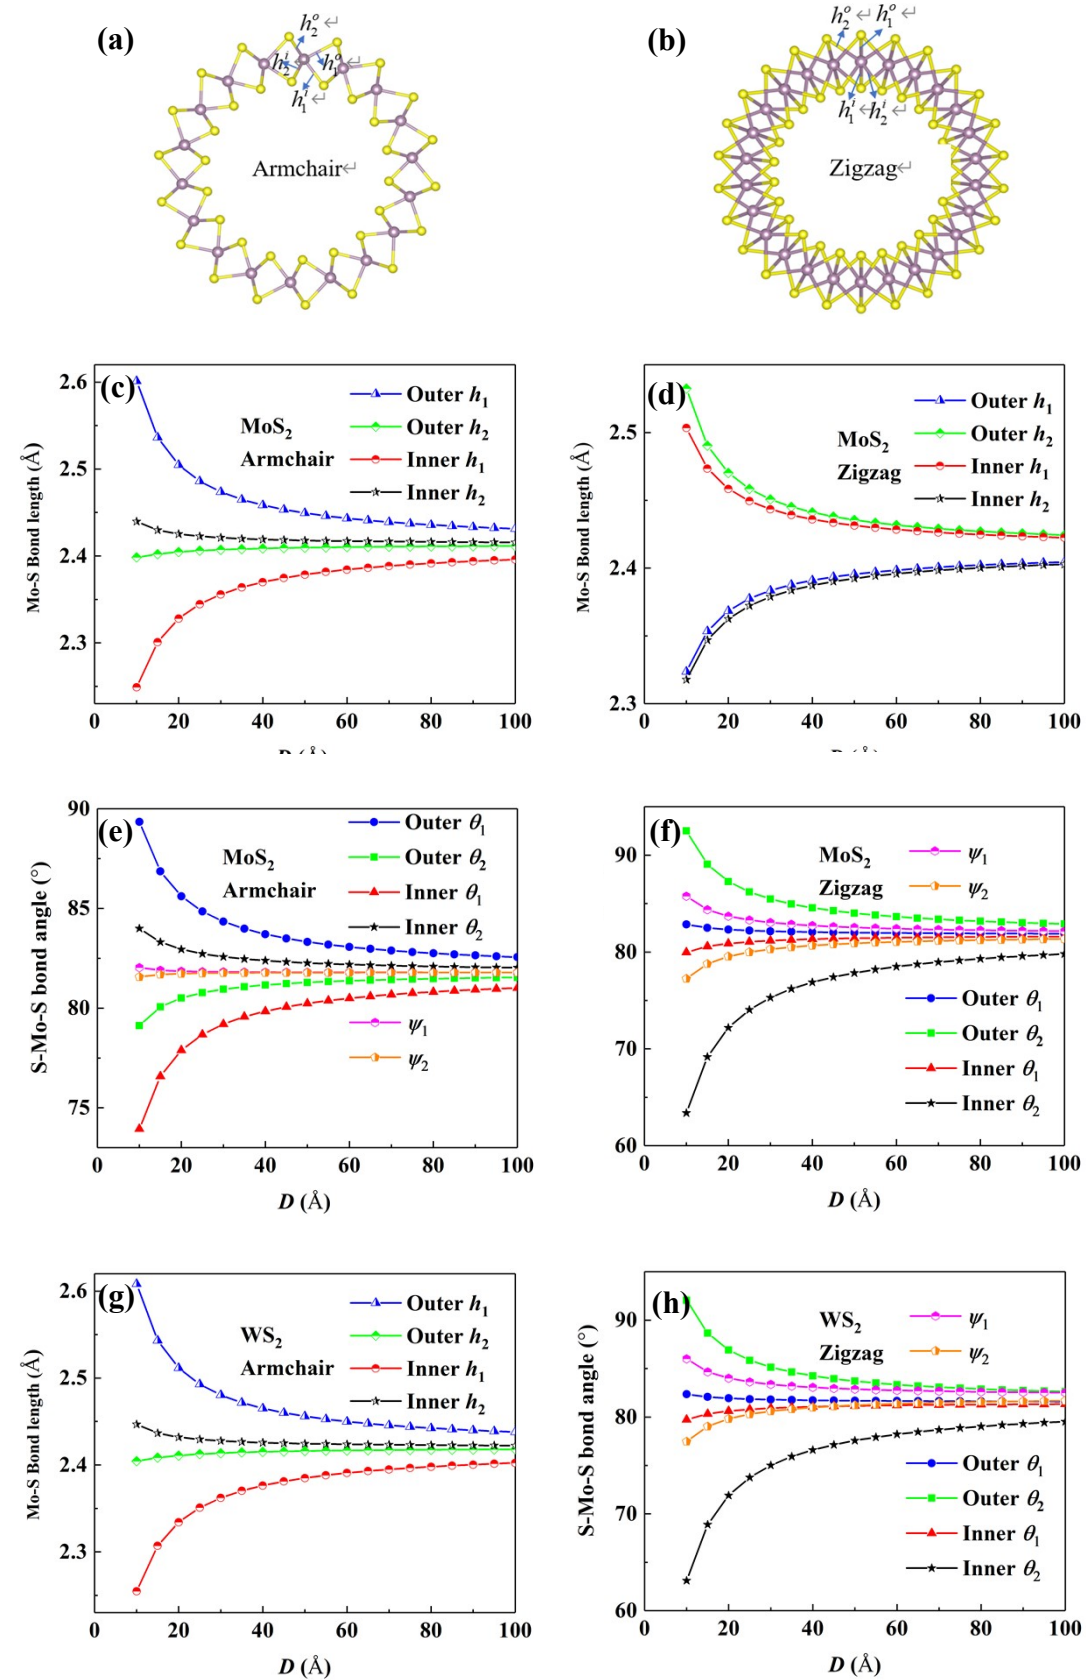

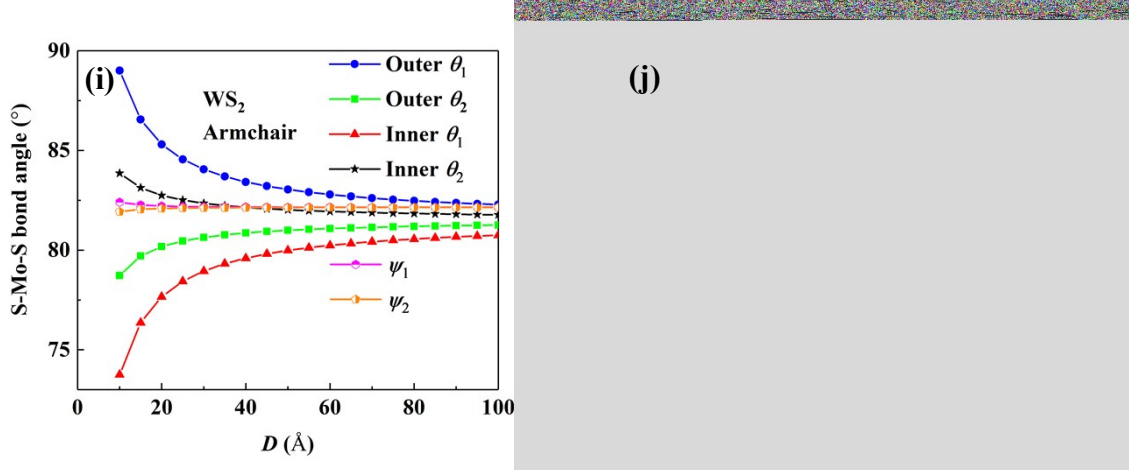

**Figure S1.** Top-views of structural configuration of SW armchair (a) and zigzag (b) MS<sub>2</sub>-NTs. (c-j) Diameter-dependent M-S bond length and bond angles of armchair and zigzag MS<sub>2</sub>-NTs.

Fig. S1(c-j) shows the bond identities (bond length and bond angle) of SW armchair and zigzag MS<sub>2</sub>-NTs as a function of tube diameter. Notably, the change of bond identities shows an anisotropic property relative to chirality, while the trends of SW MoS<sub>2</sub>- and WS<sub>2</sub>-NTs are very similar as two materials have identical lattice structures.

#### S4. Band structures of monolayer MoS<sub>2</sub> and WS<sub>2</sub>

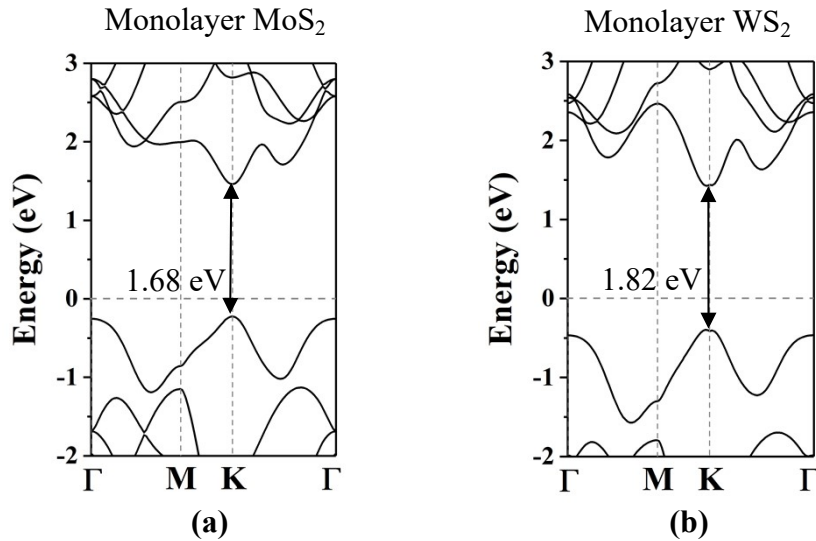

**Figure S2.** The band structures of monolayer (a) MoS<sub>2</sub> and (b) WS<sub>2</sub> are calculated by PBE method. It can be found that monolayer MoS<sub>2</sub> and WS<sub>2</sub> are the direct bandgap semiconductors with both VBM and CBM located at the K point of the first Brillouin zone.

### S5. Partial density of states of SW armchair and zigzag MoS<sub>2</sub>-NTs

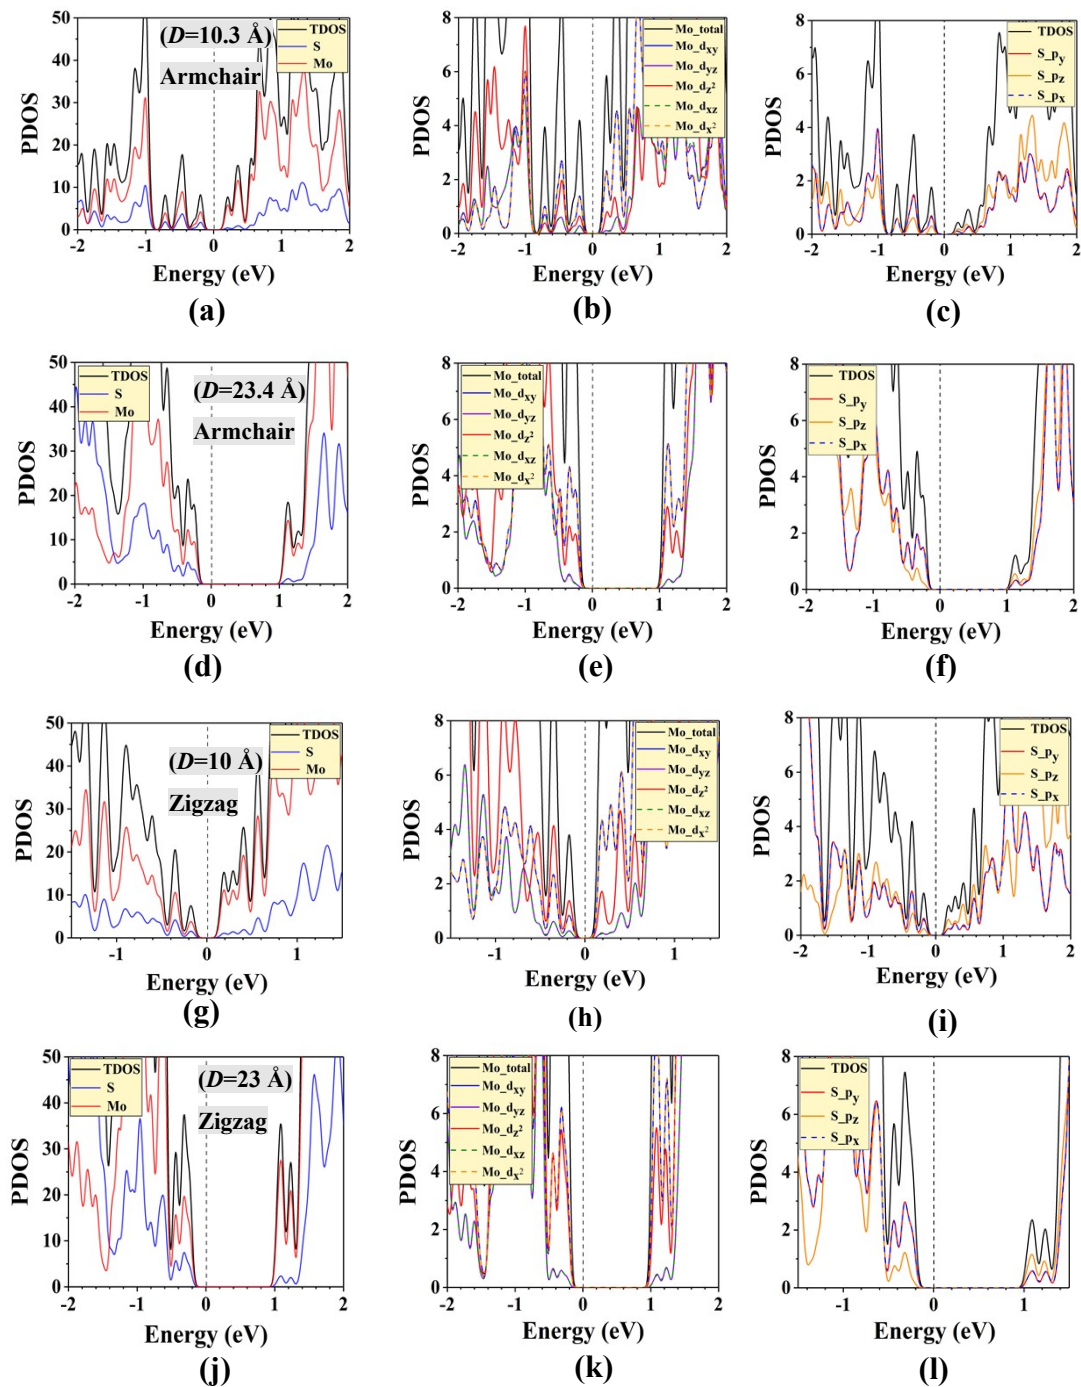

**Figure S3.** Partial density of states (PDOS) of SW armchair (a-h) and zigzag (g-l) MoS<sub>2</sub>-NTs with different diameters. For the SW armchair and zigzag MoS<sub>2</sub>-NTs, the CBM is mainly contributed by the Mo  $d_{xy}$ ,  $d_{x^2}$  and  $d_{z^2}$  states, whereas the VBM is mainly from the Mo  $d_{xy}$ ,  $d_{x^2}$ ,  $d_{z^2}$  and S  $p_x$ ,  $p_y$  states. The Fermi level is aligned to zero and indicated by vertical line.

#### S6. Phonon dispersion of SW MoS<sub>2</sub>-NTs

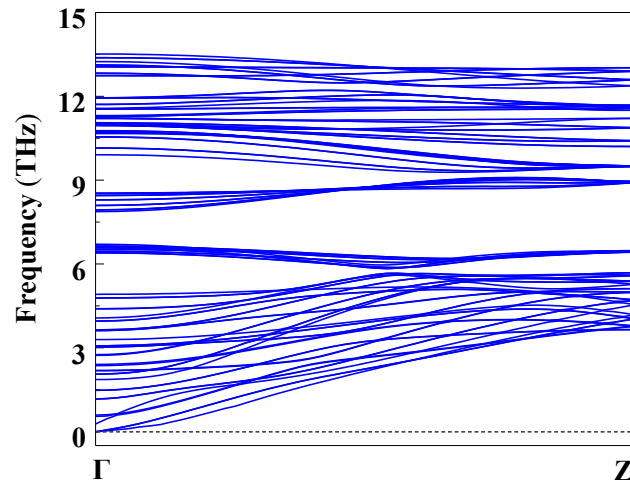

**Figure S4.** The phonon dispersion of SW armchair MoS<sub>2</sub>-NTs with diameter of 1 nm. The phonon dispersion of SW MoS<sub>2</sub>-NTs does not have negative frequencies in the Brillouin zone, suggesting the NTs is dynamically stable. The phonon spectrum is calculated by phonopy.



## S7. Polarization of SW MoS<sub>2</sub>-NTs

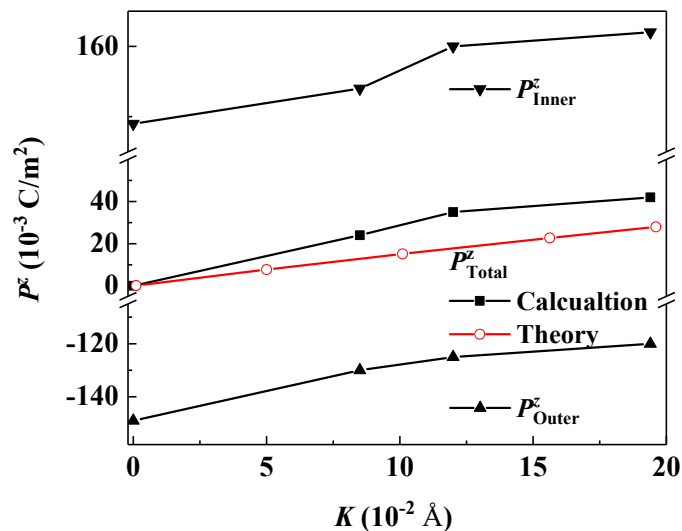

**Figure S5.** Evolution of polarization of SW MoS<sub>2</sub>-NTs under different curvature. The black lines represent the results of DFT calculations, and the red line corresponds to the results of theoretical predictions.

Fig. S5 illustrates the polarization of SW MoS<sub>2</sub>-NTs as a function of curvature. Notably, increasing the curvature of SW MoS<sub>2</sub>-NTs will result in the reduction of polarization of outer part and the enhancement of polarization of inner part, which results in the total polarization increases with increasing curvature. Moreover, the trend of polarization obtained from DFT calculations is consistent with the change of theoretical predictions. Moreover, in the DFT calculations, we have considered the enhancement effect of the polarization caused by the charge transfer, resulting in the total polarization being larger than that of the theoretical predictions.

## S8. Electron density of SW MoS<sub>2</sub>-NTs

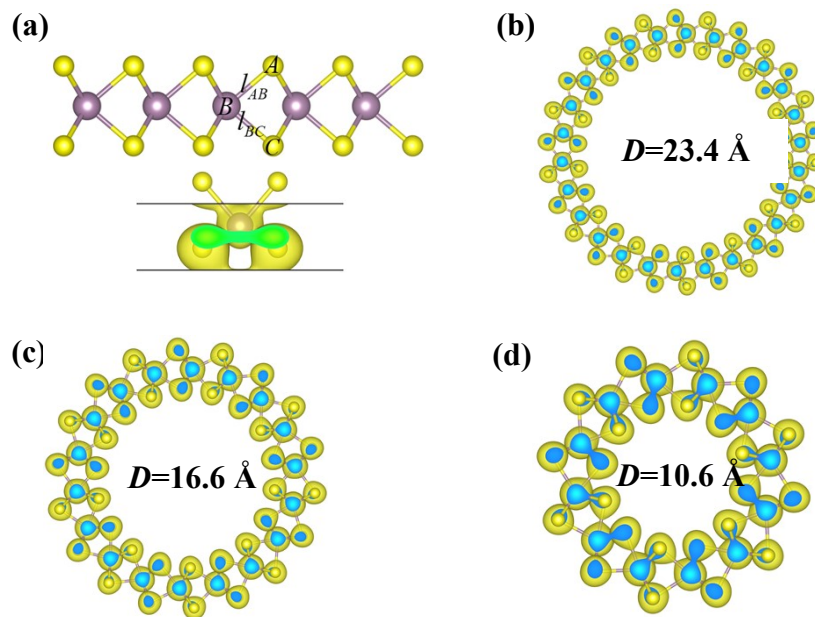

**Figure S6.** Evolution of contours of electron density of SW MoS<sub>2</sub>-NTs under different diameters. The charge transfer caused by bending is obtained from Bader analysis.

## S9. DW armchair MoS<sub>2</sub>-NTs

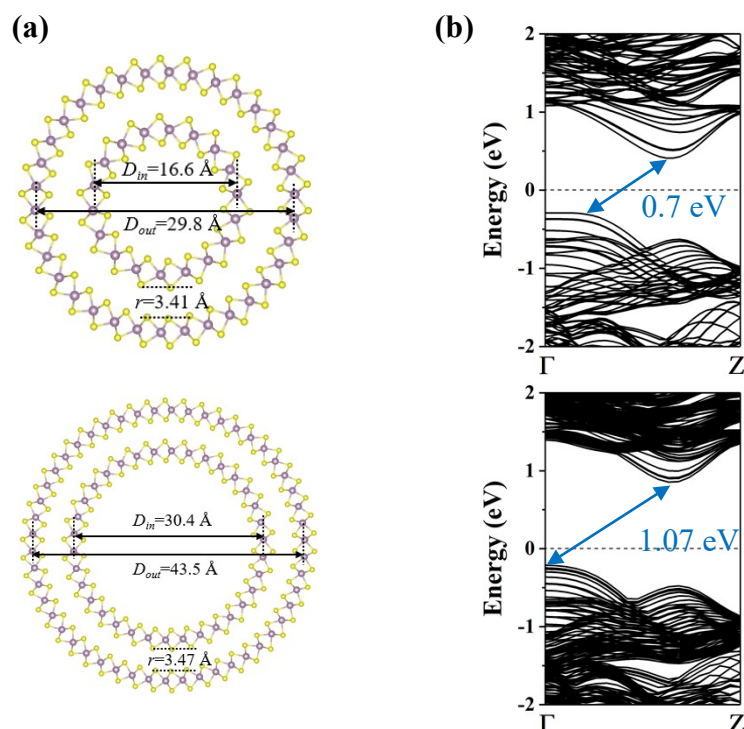

**Figure S7.** (a) Top-views of structural configuration and (b) projected band structures of DW armchair MoS<sub>2</sub>-NTs with different diameters.

### S10. Band alignment of inner and outer tubes in DW MS<sub>2</sub>-NTs

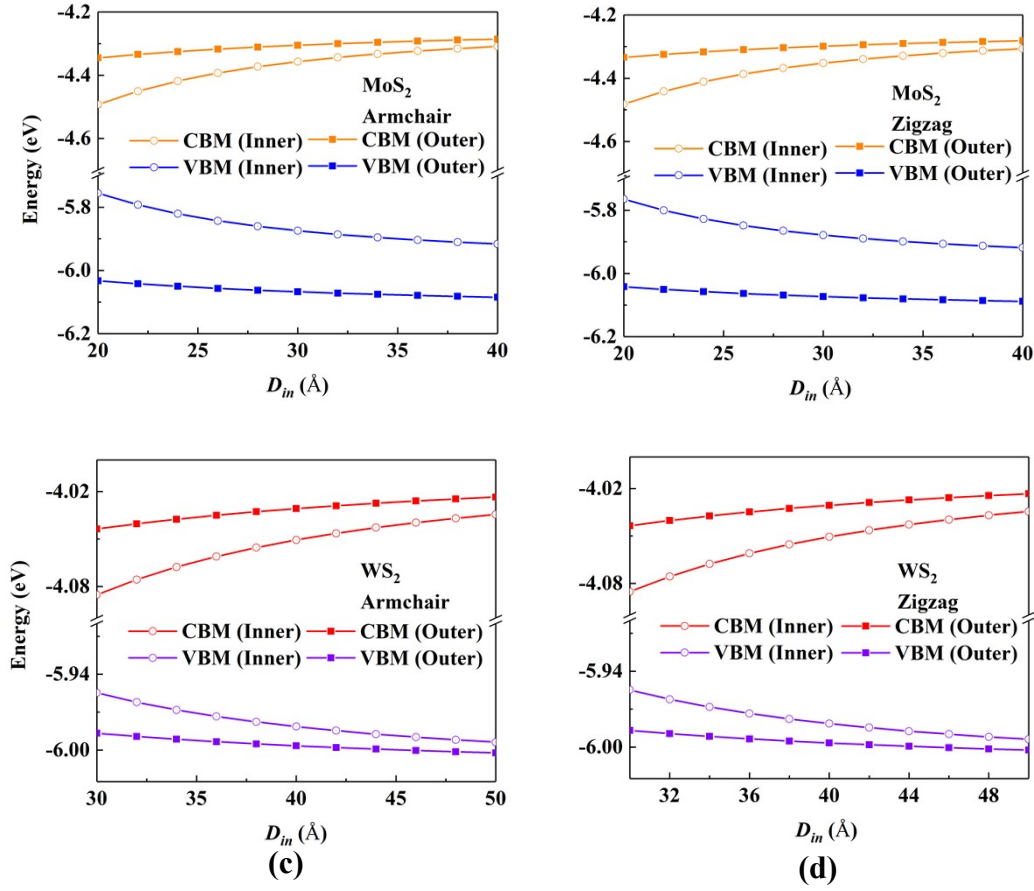

**Figure S8.** Band alignment of inner and outer tubes in DW MS<sub>2</sub>-NTs with different diameters without considering flexoelectric effect. Due to the difference of bandgap between inner and outer tubes, a type I band alignment will take place.

### S11. Evolution of band decomposed charge density of DW zigzag MoS<sub>2</sub>-NTs

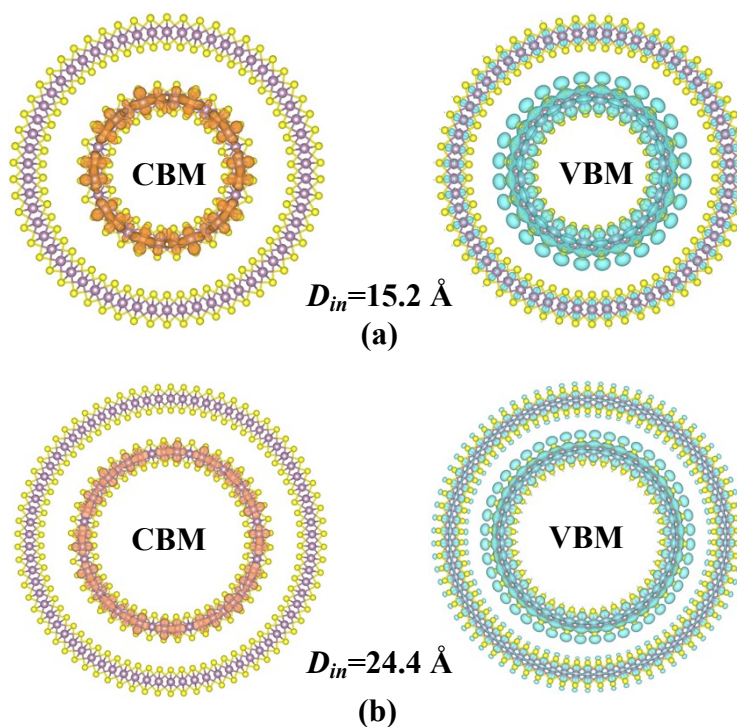

**Figure S9.** (a)-(b) DW zigzag MoS<sub>2</sub>-NTs with different diameters are calculated by DFT, where the band decomposed charge density indicating that the CBM states are always localized at the inner tube and the VBM states gradually shift from the inner to the outer as the diameter increases.

### S12. Charge density difference in DW MoS<sub>2</sub>-NTs

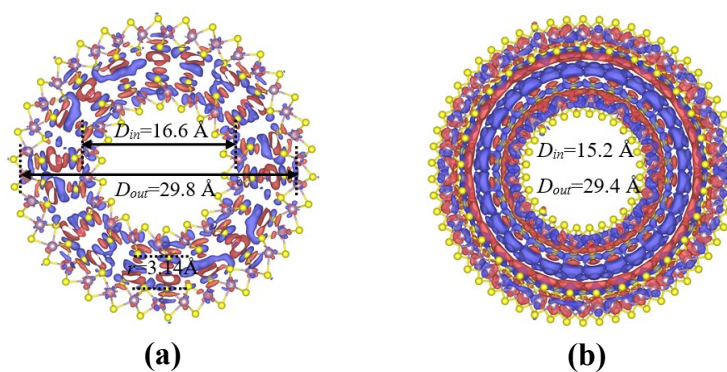

**Figure S10.** Plane-averaged charge density difference in DW (a) armchair and (b) zigzag MoS<sub>2</sub>-NTs. Isocharge plot shows significant charge transfer from outer tube to inner tube. For the DW armchair MoS<sub>2</sub>-NTs with the diameter of inner tube is 16.6 Å, the amount of transferred charge is 0.049282e. Similarly, when the diameter of inner tube is 15.2 Å, the amount of transferred charge of DW zigzag MoS<sub>2</sub>-NTs is 0.048892e.

**Table S1:** The evolution of  $\angle ABC$ , bond lengths  $l_{AB}$ ,  $l_{BC}$ , and the amount of transferred charges of Mo and S atoms in SW armchair MoS<sub>2</sub>-NTs under different diameters.

| Diameter (Å)     | Monolayer | 23.4   | 16.6   | 10.3   |
|------------------|-----------|--------|--------|--------|
| $l_{AB}$ (Å)     | 2.41      | 2.49   | 2.53   | 2.64   |
| $l_{BC}$ (Å)     | 2.41      | 2.38   | 2.37   | 2.35   |
| $\angle ABC$ (°) | 82.4      | 81.7   | 79.1   | 76.8   |
| $\Delta Q_A$ (e) | 0         | -0.047 | -0.062 | -0.074 |
| $\Delta Q_B$ (e) | 0         | +0.015 | +0.032 | +0.041 |
| $\Delta Q_C$ (e) | 0         | +0.022 | +0.030 | +0.033 |

### S13. Spontaneous flexoelectricity and band engineering in MSe<sub>2</sub>-NTs and MTe<sub>2</sub>-NTs

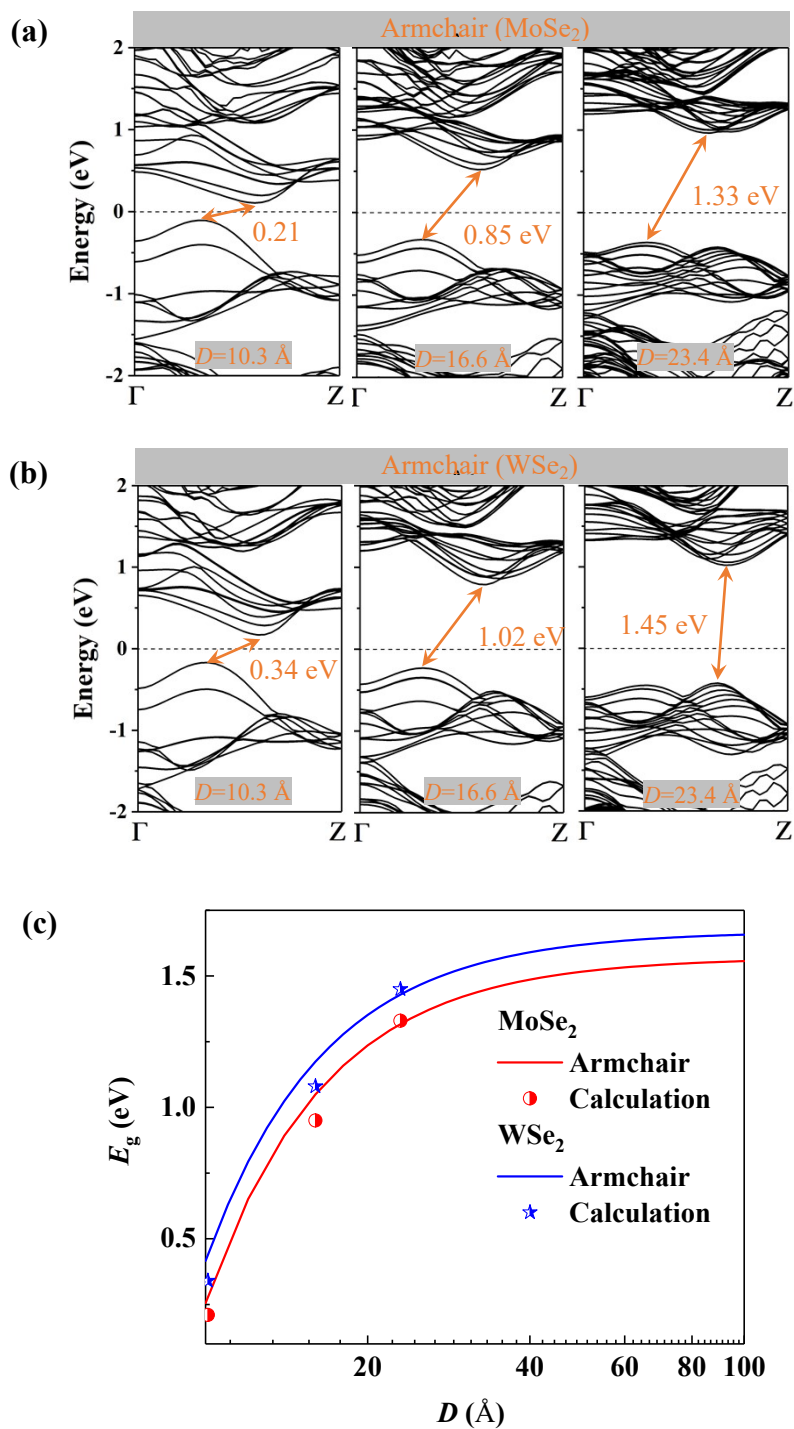

**Figure S11.** Band structures of SW armchair (a) MoSe<sub>2</sub>-NTs and (b) WSe<sub>2</sub>-NTs with different diameters. (c) Diameter-dependent bandgap of SW armchair MSe<sub>2</sub>-NTs.

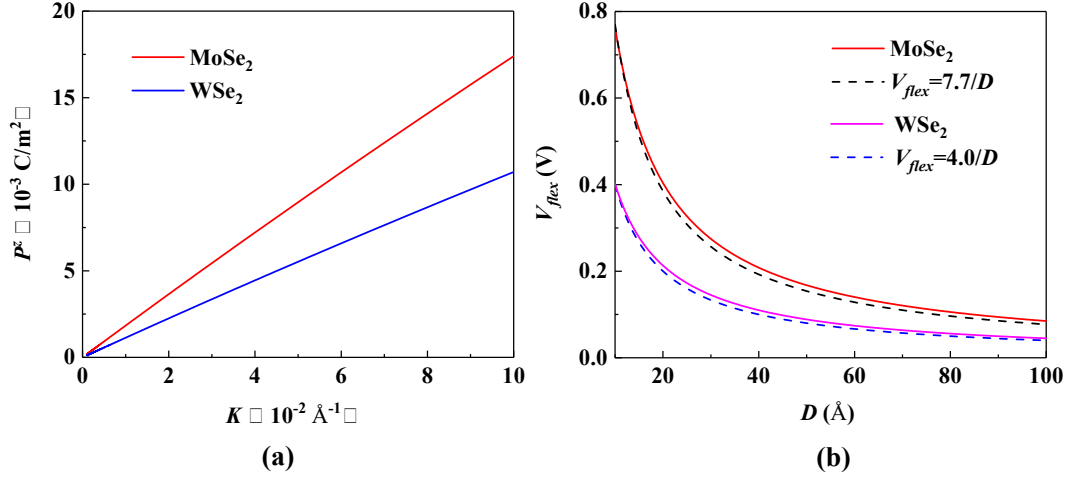

**Figure S12.** (a) Polarization  $P^z$  of SW MSe<sub>2</sub>-NTs as a function of curvature. (b) Diameter-dependent flexoelectric voltage of SW MSe<sub>2</sub>-NTs. The flexoelectric voltage in SW MSe<sub>2</sub>-NTs follows the relation  $V_{flex} = V_0 / D$ . We obtain  $V_0$  are the 7.7 VÅ and 4.0 VÅ for the SW MoSe<sub>2</sub>- and WSe<sub>2</sub>-NTs, respectively.

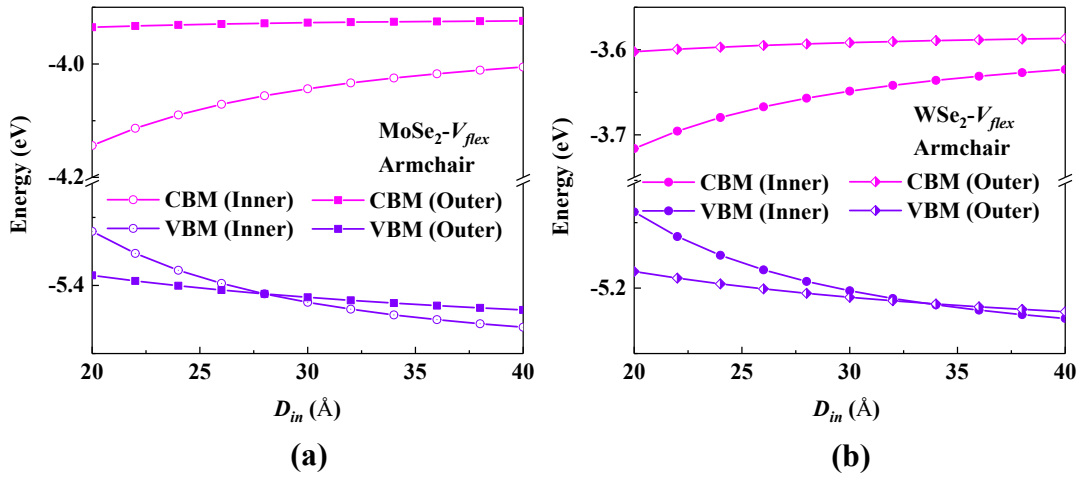

**Figure S13.** Evolutions of band alignment of inner and outer tubes in DW armchair (a) MoSe<sub>2</sub>- and (b) WSe<sub>2</sub>-NTs with different diameters. The threshold diameter is 2.8 and



3.3 nm for DW armchair MoSe<sub>2</sub>- and WSe<sub>2</sub>-NTs, respectively.

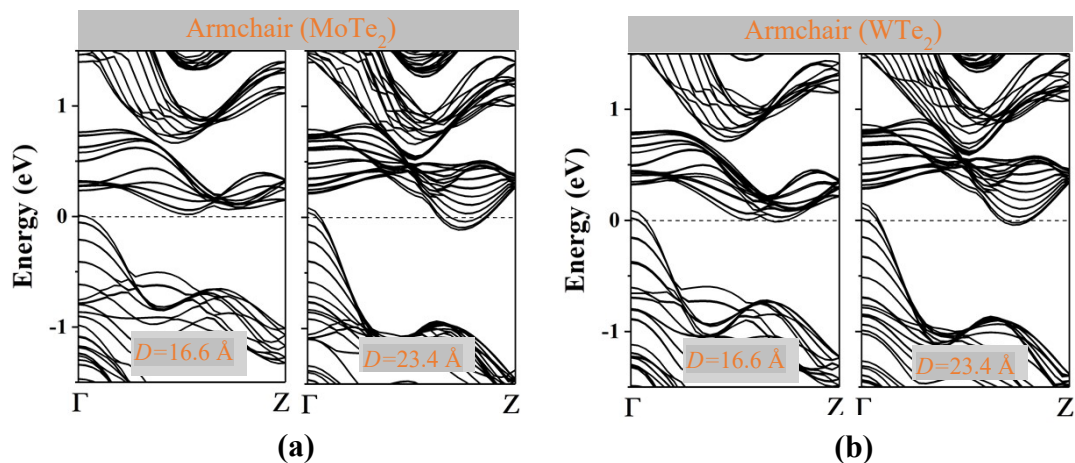

**Figure S14.** Band structures of SW armchair (a) MoTe<sub>2</sub>- NTs and (b) WTe<sub>2</sub>-NTs with different diameters.

|                         |    | Critical Diameters (nm) |     |
|-------------------------|----|-------------------------|-----|
| Critical Diameters (nm) |    | Mo                      | W   |
|                         | S  | 3.1                     | 3.6 |
|                         | Se | 2.8                     | 3.3 |
|                         | Te | -                       | -   |

**Figure S15.** Trends in critical diameters of band alignment transition in DW MX<sub>2</sub>-NTs, where M = Mo or W, and X = S, Se or Te.



**Table S2.** Input parameters for calculations of MSe<sub>2</sub>-NTs. Lattice parameters  $a$  and thickness  $H$ ,<sup>1</sup> anion partial electrostatic charges  $q_i$ ,<sup>2</sup> cohesive energy  $E_C$ ,<sup>3</sup> bandgap of monolayer  $E_g^b$ ,<sup>4</sup> electron affinity of monolayer MSe<sub>2</sub> ( $\chi$ ),<sup>1</sup> effective mass of electron ( $m_e$ ) and hole ( $m_h$ ),<sup>5</sup> dielectric constants  $\kappa$ ,<sup>5</sup> Poisson's ratio of in-plane ( $\nu_p$ ) and out-of-plane ( $\nu_\perp$ ),<sup>1</sup> respectively.

|                   | $a$  | $H$  | $q_i$ | $E_C$ | $E_g^b$ | $\chi$ | $m_e(m_h)$ | $\kappa$ | $\nu_p(\nu_\perp)$ |
|-------------------|------|------|-------|-------|---------|--------|------------|----------|--------------------|
|                   | (Å)  | (Å)  | (e)   | (eV)  | (eV)    | (eV)   | ( $m_0$ )  |          |                    |
| MoSe <sub>2</sub> | 3.32 | 3.35 | 0.71  | 2.30  | 1.57    | 3.87   | 0.7(0.55)  | 4.74     | 0.23(0.24)         |
| WSe <sub>2</sub>  | 3.32 | 3.36 | 0.49  | 3.21  | 1.67    | 3.53   | 0.53(0.52) | 5.63     | 0.19(0.20)         |

## References

- 1 J. Kang, S. Tongay, J. Zhou, J. B. Li and J. Q. Wu, *Appl. Phys. Lett.*, 2013, **102**, 012111.
- 2 K. H. Michel, D. Çakır, C. Sevik and F. M. Peeters, *Phys. Rev. B*, 2017, **95**, 125415.
- 3 Y. Liu, Y. Wang, M. Bo, X. J. Liu, X. X. Yang, Y. L. Huang and C. Q. Sun, *J. Phys. Chem. C*, 2015, **119**, 25071.
- 4 M. Zhang, J. Wu, Y. Zhu, D. O. Dumcenco, J. Hong, N. Mao, S. Deng, Y. Chen, Y. Yang, C. Jin, S. H. Chaki, Y. Huang, Jin Zhang and L. M. Xie, *ACS Nano* 2014, **8**, 7130-7137.
- 5 A. Ramasubramaniam, *Phys. Rev. B*, 2012, **86**, 115409.
